# Supplementary material for: PlioMIP2 simulations with NorESM-L and NorESM1-F
Source: Copernicus journal article supplement (doi:10.5194/cp-16-183-2020), 2020-01-23
Supplement: Supplementary file 1 [file cp-16-183-2020-supplement.pdf]

Supplement of Clim. Past, 16, 183–197, 2020  
<https://doi.org/10.5194/cp-16-183-2020-supplement>  
© Author(s) 2020. This work is distributed under  
the Creative Commons Attribution 4.0 License.

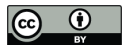

*Supplement of*

## **PlioMIP2 simulations with NorESM-L and NorESM1-F**

**Xiangyu Li et al.**

*Correspondence to:* Zhongshi Zhang (zhzh@norceresearch.no)

The copyright of individual parts of the supplement might differ from the CC BY 4.0 License.

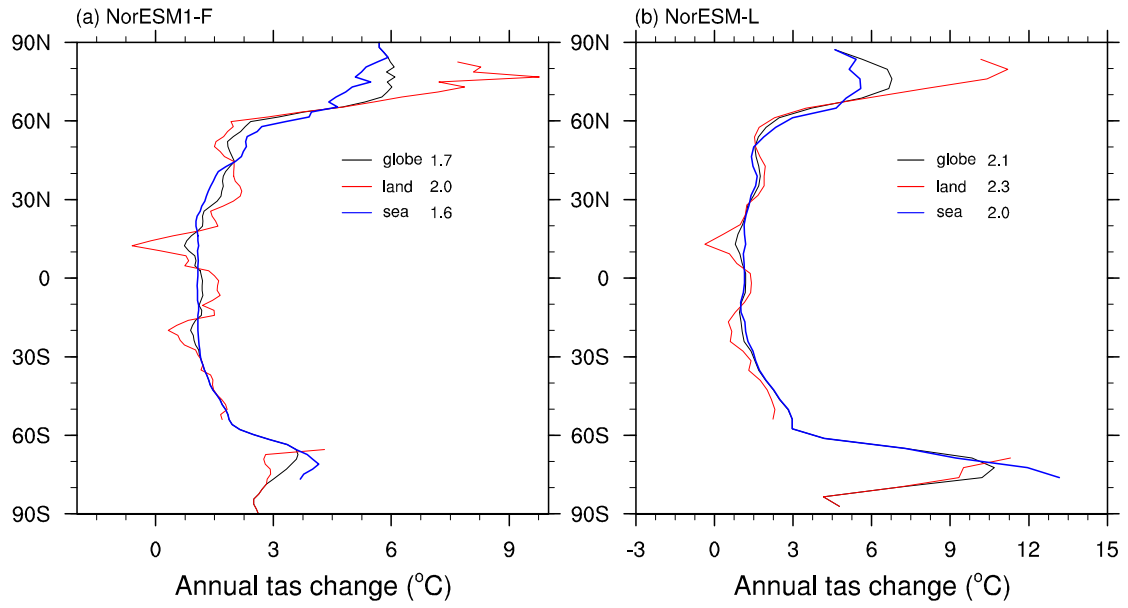

**Fig. S1.** The zonal mean of the difference in climatological annual mean surface air temperatures (units: °C) between Pliocene and pre-industrial experiments according to NorESM1-F (left panel) and NorESM-L (right panel). The black, red, and blue lines represent values over globe, land, and ocean, respectively.

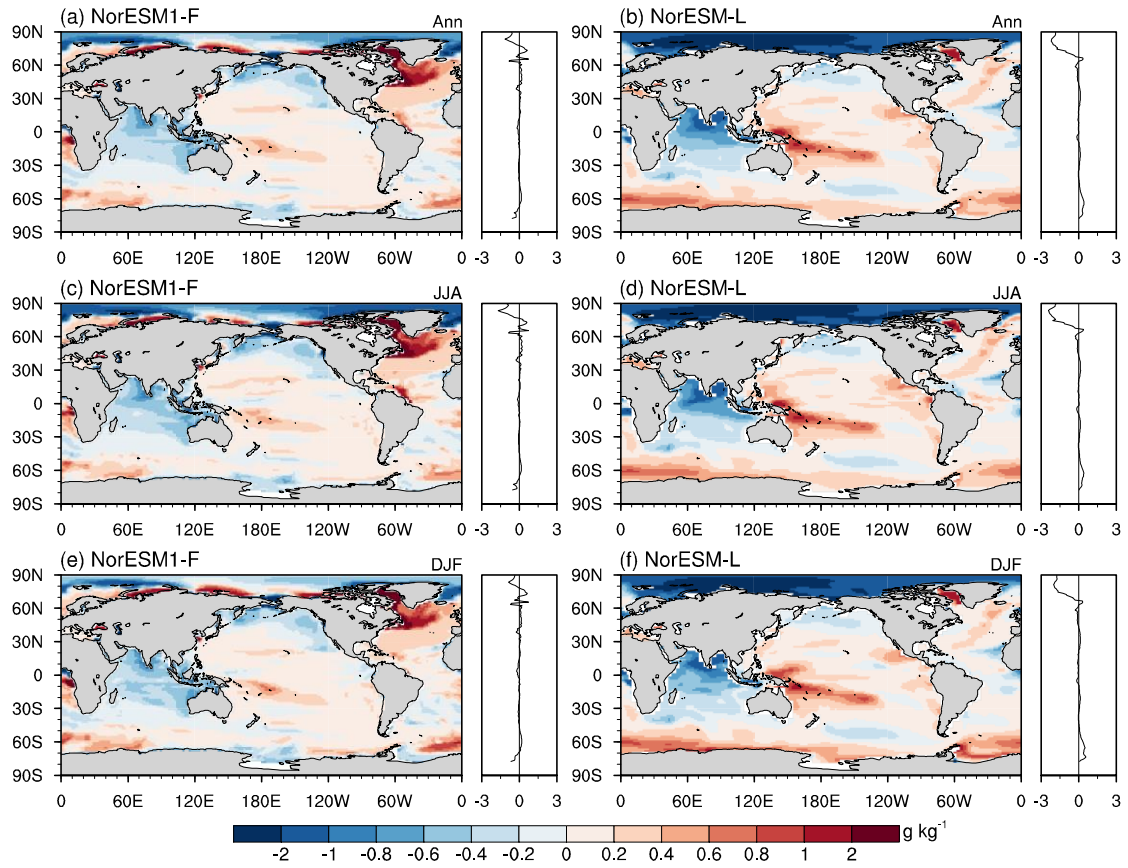

**Fig. S2.** The difference in climatological sea surface salinity (units:  $\text{g kg}^{-1}$ ) between Pliocene and pre-industrial experiments according to NorESM1-F (left panel) and NorESM-L (right panel) for the annual mean (a and b), boreal summer (c and d), and boreal winter (e and f). The zonal mean is shown to the right of each plot. For each grid, the global mean shift is excluded to emphasize the response of the sea surface salinity contrast between ocean basins in the Pliocene experiment.

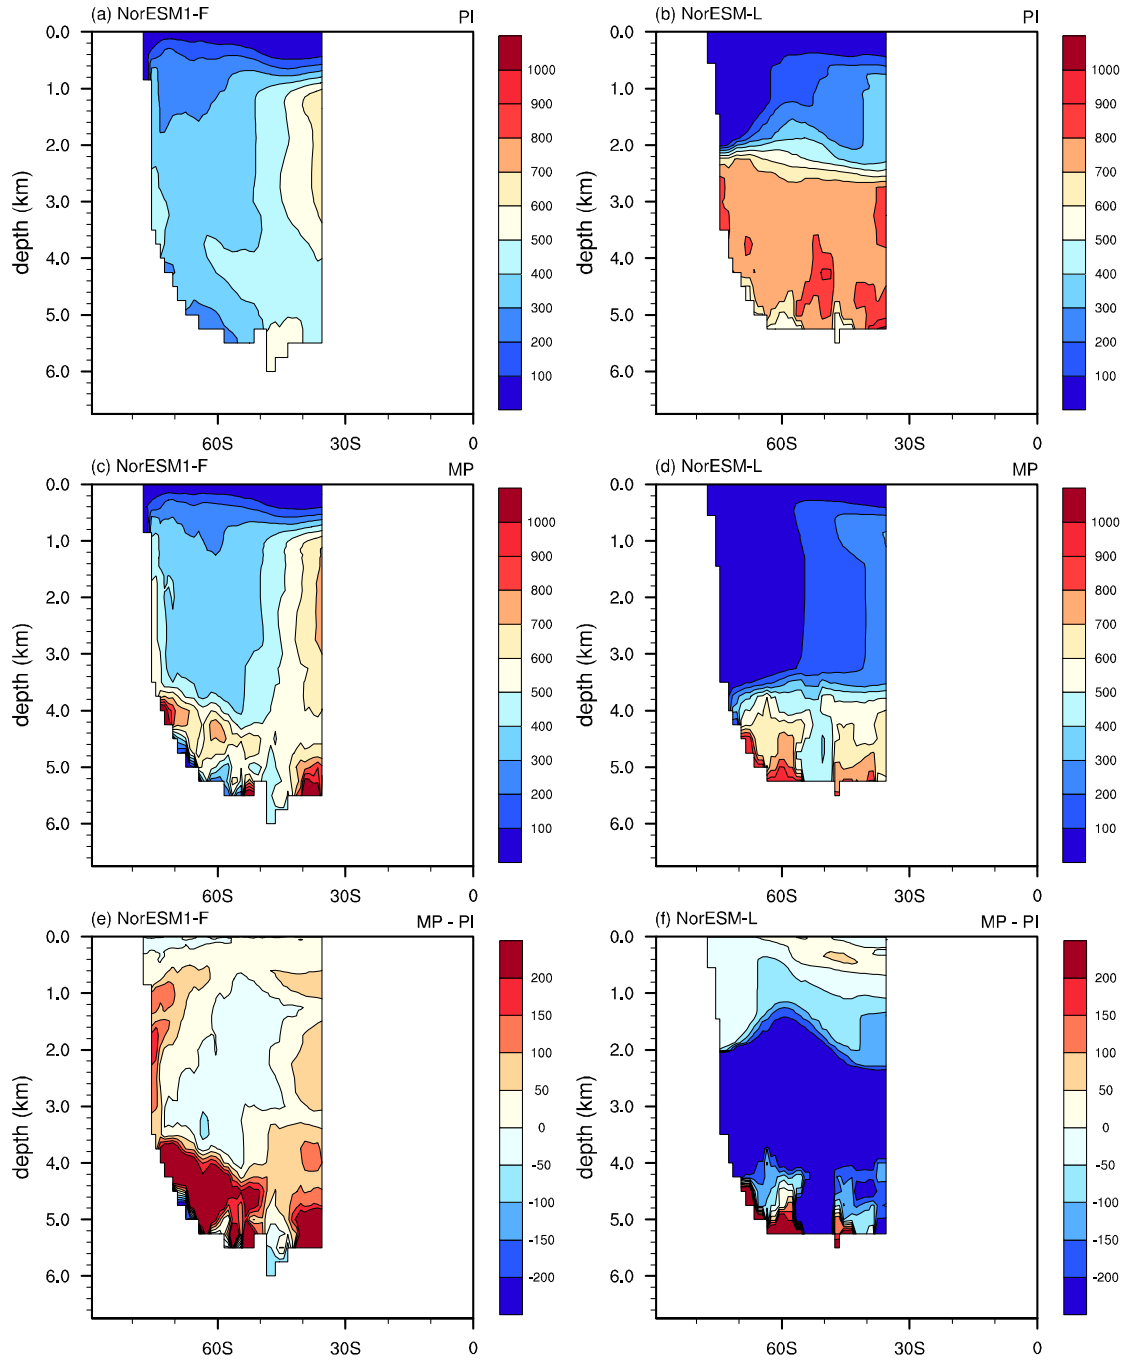

**Fig. S3. Climatological Southern Ocean ideal age (units: year) derived from the pre-industrial (a and b) and Pliocene (c and d) experiments, and their differences (e and f) according to NorESM1-F (left panel) and NorESM-L (right panel).**
